# Supplementary material for: Fully automated and highly specific plasma β-amyloid immunoassays predict β-amyloid status defined by amyloid positron emission tomography with high accuracy
Source: PubMed Central journal article supplement (PMC9219197; doi:10.1186/s13195-022-01029-0), 2022-06-23
Supplement: 13195_2022_1029_MOESM1_ESM.pdf [file 13195_2022_1029_MOESM1_ESM.pdf]

## Supplemental Material

Yamashita K, Miura M, Watanabe S, et al. Fully automated and highly specific plasma  $\beta$ -amyloid immunoassays predict  $\beta$ -amyloid status defined by amyloid PET with high accuracy

**Table S1.** Logistic regression model of plasma  $A\beta_{42}/A\beta_{40}$  ratio combined with APOE  $\epsilon 4$  status in the prediction of amyloid PET status.

**Figure S1.** Logistic regression model of plasma  $A\beta_{42}/A\beta_{40}$  ratio combined with APOE  $\epsilon 4$  status in the prediction of amyloid PET status.

**Figure S2.** Performance of plasma  $A\beta$  levels in the prediction of amyloid PET status determined by Centiloid unit.

**Table S1. Logistic regression model of plasma A $\beta$ 42/A $\beta$ 40 ratio combined with *APOE*  $\epsilon$ 4 status in the prediction of amyloid PET status**

|                                 | Discovery |        |                | Validation |        |                |
|---------------------------------|-----------|--------|----------------|------------|--------|----------------|
|                                 | Estimate  | SE     | <i>P</i> value | Estimate   | SE     | <i>P</i> value |
| Intercept                       | 25.05     | 3.889  |                | 12.71      | 2.031  |                |
| A $\beta$ 42/A $\beta$ 40       | -253.4    | 39.16  | < 0.001        | -129.3     | 19.94  | < 0.001        |
| <i>APOE</i> $\epsilon$ 4 status | 1.446     | 0.5350 | < 0.01         | 0.4594     | 0.3789 | 0.2253         |

Amyloid PET status was predicted by plasma A $\beta$ 42/A $\beta$ 40 ratio and *APOE*  $\epsilon$ 4 status (*APOE*  $\epsilon$ 4 positive or negative) as predictors in logistic regression model. Amyloid PET status was determined by visual read method.

Abbreviations: A $\beta$ ,  $\beta$ -amyloid; *APOE*, Apolipoprotein E; SE, standard error; PET, Positron Emission Tomography

**Figure S1**

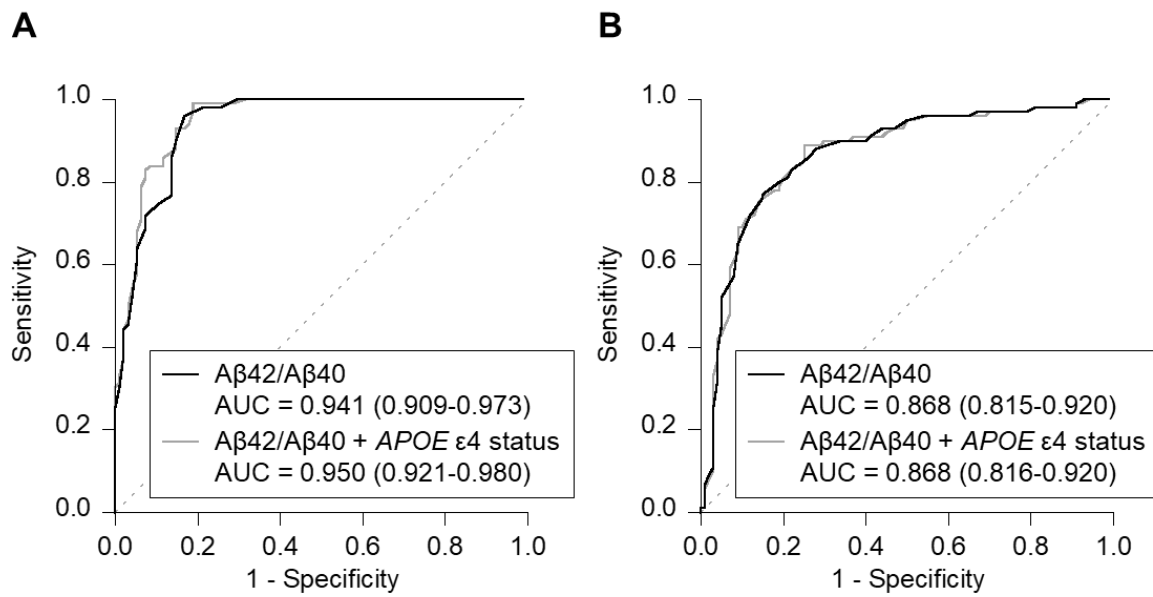

**Figure S1. Logistic regression model of plasma A $\beta$ 42/A $\beta$ 40 ratio combined with *APOE*  $\epsilon$ 4 status in the prediction of amyloid PET status.** Receiver operating characteristic (ROC) analyses for A $\beta$ 42/A $\beta$ 40 ratio and the model including *APOE*  $\epsilon$ 4 status in (A) discovery (n = 194) and (B) validation (n = 200) studies. The area under the curves (AUCs) are described with 95% confidence intervals. Amyloid PET status was determined by visual reads.

**Figure S2**

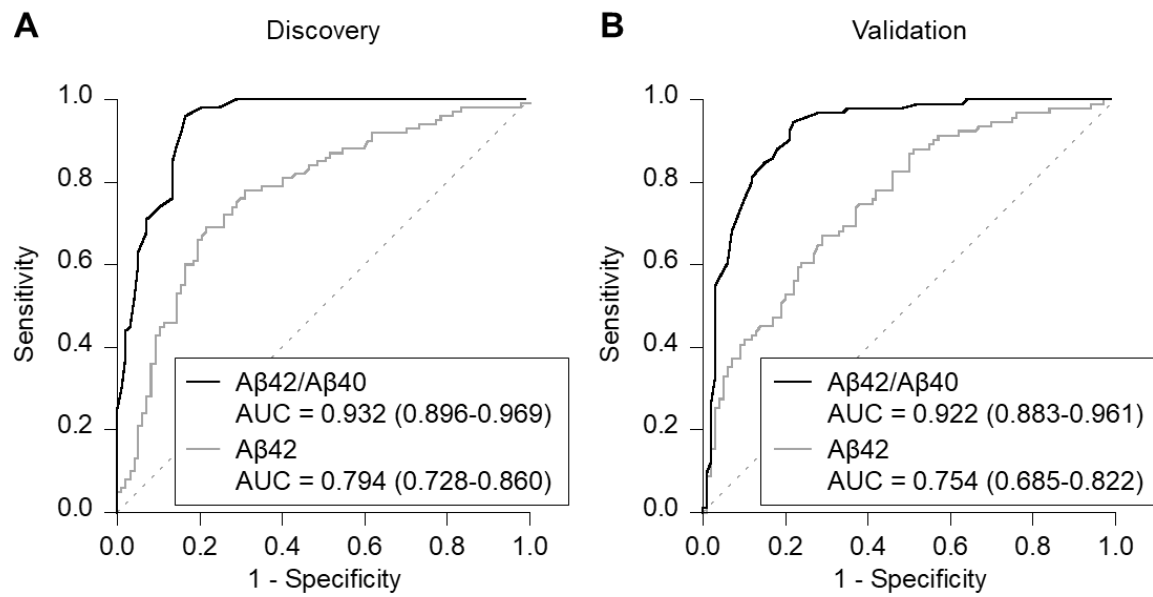

**Figure S2. Performance of plasma A $\beta$  levels in the prediction of amyloid PET status determined by Centiloid unit.** Receiver operating characteristic (ROC) analyses for plasma A $\beta$ 42 and A $\beta$ 42/A $\beta$ 40 ratio in (A) discovery (n = 180) and (B) validation (n = 191) studies. The area under the curves (AUCs) are described with 95% confidence intervals. Amyloid PET status was determined by Centiloid unit.
